# Supplementary material for: Dimesogenic compounds consisting of cholesterol and fluorinated azobenzene moieties: dependence of liquid crystal properties on spacer length and fluorination of the terminal tail
Source: Royal Society of Chemistry journal article supplement (doi:10.1039/b516141j), 2006-01-01
Supplement: b516141j.pdf [file b516141j.pdf]

**Electronic Supplementary Information of B516141J by W. -K. Lee et al.**

**4-[5-(cholesteryloxycarbonyl)butyloxy]-4'-octyloxy-2',3'-difluoroazobenzene (2) (F-AOC-4)**

$\delta_{\text{H}}$  (300 MHz;  $\text{CDCl}_3$ ;  $\text{Me}_4\text{Si}$ ): 0.67~2.04 (m, CH,  $\text{CH}_2$ ,  $\text{CH}_3$ ), 2.29 (q, O-CH- $\text{CH}_2$ ), 4.03 (t,  $\text{CH}_2$ -O), 4.10 (t,  $\text{CH}_2$ -O), 5.37 (d, C=CH), 6.84 (d, ArCH), 6.99 (d, ArCH), 7.53 (t, ArCH), 7.90 (d, ArCH). FT-IR (KBr,  $\text{cm}^{-1}$ ): 2941 and 2869 (C-H stretching), 1730 (C=O stretching), 1602 and 1468 (ArC=C stretching), 1248 and 1169 (C-O stretching). Elemental analysis: calcd for  $\text{C}_{52}\text{H}_{76}\text{F}_2\text{N}_2\text{O}_4$ , C 75.14, H 9.22, N 3.37 %; found C 75.17, H 9.20, N 3.38 %

**4-[6-(cholesteryloxycarbonyl)pentyloxy]-4'-octyloxy-2',3'-difluoroazobenzene (2) (F-AOC-5)**

$\delta_{\text{H}}$  (300 MHz;  $\text{CDCl}_3$ ;  $\text{Me}_4\text{Si}$ ): 0.67~2.04 (m, CH,  $\text{CH}_2$ ,  $\text{CH}_3$ ), 2.29 (q, O-CH- $\text{CH}_2$ ), 4.03 (t,  $\text{CH}_2$ -O), 4.10 (t,  $\text{CH}_2$ -O), 5.37 (d, C=CH), 6.84 (d, ArCH), 6.99 (d, ArCH), 7.53 (t, ArCH), 7.90 (d, ArCH). FT-IR (KBr,  $\text{cm}^{-1}$ ): 2941 and 2869 (C-H stretching), 1730 (C=O stretching), 1602 and 1468 (ArC=C stretching), 1248 and 1169 (C-O stretching). Elemental analysis: calcd. for  $\text{C}_{53}\text{H}_{78}\text{F}_2\text{N}_2\text{O}_4$ , C 75.32, H 9.30, N 3.31 %; found C 75.31, H 9.33, N 3.30 %

**4-[7-(cholesteryloxycarbonyl)hexyloxy]-4'-octyloxy-2',3'-difluoroazobenzene (2) (F-AOC-6)**

$\delta_{\text{H}}$  (300 MHz;  $\text{CDCl}_3$ ;  $\text{Me}_4\text{Si}$ ): 0.67~2.04 (m, CH,  $\text{CH}_2$ ,  $\text{CH}_3$ ), 2.29 (q, O-CH- $\text{CH}_2$ ), 4.03 (t,  $\text{CH}_2$ -O), 4.10 (t,  $\text{CH}_2$ -O), 5.37 (d, C=CH), 6.84 (d, ArCH), 6.99 (d, ArCH), 7.53 (t, ArCH), 7.90 (d, ArCH). FT-IR (KBr,  $\text{cm}^{-1}$ ): 2941 and 2869 (C-H stretching), 1730 (C=O stretching), 1602 and 1468 (ArC=C stretching), 1248 and 1169 (C-O stretching). Elemental analysis: calcd for  $\text{C}_{54}\text{H}_{80}\text{F}_2\text{N}_2\text{O}_4$ , C 75.48, H 9.38, N 3.26 %; found C 75.49, H 9.38, N 3.27 %

**4-[9-(cholesteryloxycarbonyl)octyloxy]-4'-octyloxy-2',3'-difluoroazobenzene (2) (F-AOC-8)**

$\delta_{\text{H}}$  (300 MHz;  $\text{CDCl}_3$ ;  $\text{Me}_4\text{Si}$ ): 0.67~2.04 (m, CH,  $\text{CH}_2$ ,  $\text{CH}_3$ ), 2.29 (q, O-CH- $\text{CH}_2$ ), 4.03 (t,  $\text{CH}_2$ -O), 4.10 (t,  $\text{CH}_2$ -O), 5.37 (d, C=CH), 6.84 (d, ArCH), 6.99 (d, ArCH), 7.53 (t, ArCH), 7.90 (d, ArCH). FT-IR (KBr,  $\text{cm}^{-1}$ ): 2941 and 2869 (C-H stretching), 1730 (C=O stretching), 1602 and 1468 (ArC=C stretching), 1248 and 1169 (C-O stretching). Elemental analysis: calcd. for  $\text{C}_{56}\text{H}_{84}\text{F}_2\text{N}_2\text{O}_4$ , C 75.81, H 9.54, N 3.16 %; found C 75.80, H 9.56, N 3.17 %

**4-[10-(cholesteryloxycarbonyl)nonyloxy]-4'-octyloxy-2',3'-difluoroazobenzene (2) (F-AOC-9)**

$\delta_{\text{H}}$  (300 MHz;  $\text{CDCl}_3$ ;  $\text{Me}_4\text{Si}$ ): 0.67~2.04 (m, CH,  $\text{CH}_2$ ,  $\text{CH}_3$ ), 2.29 (q, O-CH- $\text{CH}_2$ ), 4.03 (t,  $\text{CH}_2$ -O), 4.10 (t,  $\text{CH}_2$ -O), 5.37 (d, C=CH), 6.84 (d, ArCH), 6.99 (d, ArCH), 7.53 (t, ArCH), 7.90 (d, ArCH). FT-IR (KBr,  $\text{cm}^{-1}$ ): 2941 and 2869 (C-H stretching), 1730 (C=O stretching), 1602 and 1468 (ArC=C stretching), 1248 and 1169 (C-O stretching). Elemental analysis: calcd. for  $\text{C}_{57}\text{H}_{86}\text{F}_2\text{N}_2\text{O}_4$ , C 75.96, H 9.62, N 3.11 %; found C 75.94, H 9.62, N 3.12 %

**4-[11-(cholesteryloxycarbonyl)decanoyloxy]-4'-octyloxy-2',3'-difluoroazobenzene (2) (F-AOC-10)**

$\delta_{\text{H}}$  (300 MHz;  $\text{CDCl}_3$ ;  $\text{Me}_4\text{Si}$ ): 0.67~2.04 (m, CH,  $\text{CH}_2$ ,  $\text{CH}_3$ ), 2.29 (q, O-CH- $\text{CH}_2$ ), 4.03 (t,  $\text{CH}_2$ -O), 4.10 (t,  $\text{CH}_2$ -O), 5.37 (d, C=CH), 6.84 (d, ArCH), 6.99 (d, ArCH), 7.53 (t, ArCH), 7.90 (d, ArCH). FT-IR (KBr,  $\text{cm}^{-1}$ ): 2941 and 2869 (C-H

stretching), 1730 (C=O stretching), 1602 and 1468 (ArC=C stretching), 1248 and 1169 (C-O stretching). Elemental analysis: calcd. for  $\text{C}_{58}\text{H}_{88}\text{F}_2\text{N}_2\text{O}_4$ , C 76.11, H 9.69, N 3.06 %; found C 76.12, H 9.70, N 3.06 %

**4-[12-(cholesteryloxycarbonyl)undecanoyloxy]-4'-octyloxy-2',3'-difluoroazobenzene (2) (F-AOC-11)**

$\delta_{\text{H}}$  (300 MHz;  $\text{CDCl}_3$ ;  $\text{Me}_4\text{Si}$ ): 0.67~2.04 (m, CH,  $\text{CH}_2$ ,  $\text{CH}_3$ ), 2.29 (q, O-CH- $\text{CH}_2$ ), 4.03 (t,  $\text{CH}_2$ -O), 4.10 (t,  $\text{CH}_2$ -O), 5.37 (d, C=CH), 6.84 (d, ArCH), 6.99 (d, ArCH), 7.53 (t, ArCH), 7.90 (d, ArCH). FT-IR (KBr,  $\text{cm}^{-1}$ ): 2941 and 2869 (C-H stretching), 1730 (C=O stretching), 1602 and 1468 (ArC=C stretching), 1248 and 1169 (C-O stretching). Elemental analysis: calcd. for  $\text{C}_{59}\text{H}_{90}\text{F}_2\text{N}_2\text{O}_4$ , C 76.25, H 9.76, N 3.01 %; found C 76.25, H 9.75, N 3.02 %

**4-[13-(cholesteryloxycarbonyl)dodecanoyloxy]-4'-octyloxy-2',3'-difluoroazobenzene (2) (F-AOC-12)**

$\delta_{\text{H}}$  (300 MHz;  $\text{CDCl}_3$ ;  $\text{Me}_4\text{Si}$ ): 0.67~2.04 (m, CH,  $\text{CH}_2$ ,  $\text{CH}_3$ ), 2.29 (q, O-CH- $\text{CH}_2$ ), 4.03 (t,  $\text{CH}_2$ -O), 4.10 (t,  $\text{CH}_2$ -O), 5.37 (d, C=CH), 6.84 (d, ArCH), 6.99 (d, ArCH), 7.53 (t, ArCH), 7.90 (d, ArCH). FT-IR (KBr,  $\text{cm}^{-1}$ ): 2941 and 2869 (C-H stretching), 1730 (C=O stretching), 1602 and 1468 (ArC=C stretching), 1248 and 1169 (C-O stretching). Elemental analysis: calcd. for  $\text{C}_{60}\text{H}_{92}\text{F}_2\text{N}_2\text{O}_4$ , C 76.39, H 9.83, N 2.97 %; found C 76.40, H 9.83, N 2.99 %

**4-{4-(1H,1H-perfluorooctyloxy)-2,3-difluorophenylazo}phenol (3)**

4-(1H,1H-Pentadecafluorooctyloxy)phenylamine (10.3 g; 21 mmol) was dissolved with heating in a mixture of 60 ml of glacial acetic acid, 30.0 mL of concentrated hydrochloric acid and 30.0 mL of water. After cooling to 0~5 °C, diazotization was performed by adding dropwise a solution of  $\text{NaNO}_2$  (1.86 g; 27 mmol) in 30.0 mL of water to the acid solution. The prepared diazonium salt solution was slowly added to a stirred solution of 2, 3-difluorophenol (3.64 g; 28 mmol), NaOH (3.00g; 75 mmol),  $\text{Na}_2\text{CO}_3$  (10.1 g; 95 mmol) and 150 ml of water followed by stirring for 1 h at 0-5 °C. The yellow-orange to yellow-green colored precipitate was filtered off, dried and purified by chromatography using a silica gel column and  $\text{CH}_2\text{Cl}_2$  as eluent. Dark brown solid product was obtained, 6.50 g (49.0 %), mp 97 °C.  $\delta_{\text{H}}$  (300 MHz;  $\text{CDCl}_3$ ;  $\text{Me}_4\text{Si}$ ): 4.54 (t,  $\text{CH}_2$ ), 6.78 (t, Ar-H), 7.05 (d, Ar-H), 7.52 (t, Ar-H), 7.93 (d, Ar-H). FT-IR (KBr,  $\text{cm}^{-1}$ ): 3100 (ArC-OH stretching), 2941 and 2869 (C-H stretching), 1602 and 1468 (ArC=C stretching), 1248 and 1169 (C-O stretching). Elemental analysis: calcd. for  $\text{C}_{20}\text{H}_9\text{F}_{17}\text{N}_2\text{O}_2$ , C 37.99, H 1.43, N 4.43 %; found C 38.00, H 1.44, N 4.45 %

**4-{8-(cholesteryloxycarbonyl)heptyloxy}-4'-perfluorooctyloxy-2',3'-difluoroazobenzene (4) (F-AOCF-7)**

$\delta_{\text{H}}$  (300 MHz;  $\text{CDCl}_3$ ;  $\text{Me}_4\text{Si}$ ): 0.60~1.91 (m, CH,  $\text{CH}_2$ ,  $\text{CH}_3$ ), 2.27 (m, -C=C- $\text{CH}_2$ -, -O-CO- $\text{CH}_2$ -), 4.54 (m, - $\text{CF}_2\text{CH}_2\text{Ar}$ -, -OCH-), 5.36 (m, -C=CH-), 6.78 (t, Ar-H), 7.05 (d, Ar-H), 7.52 (t, Ar-H), 7.93 (d, Ar-H). FT-IR (KBr,  $\text{cm}^{-1}$ ): 2941 and 2868 (aliphatic C-H stretching), 1737 (C=O stretching), 1587 (aromatic C=C stretching), 1246 and 1145 (C-O stretching). Elemental analysis: calcd. for  $\text{C}_{55}\text{H}_{67}\text{F}_{17}\text{N}_2\text{O}_4$ , C 57.79, H 5.91, N 2.45 %; found C 57.78, H 5.91, N 2.46 %

**4-{5-(cholesteryloxycarbonyl)butyloxy}-4'-perfluorooctyloxy-2',3'-difluoroazobenzene (4) (F-AOCF-4)**

$\delta_{\text{H}}$  (300 MHz;  $\text{CDCl}_3$ ;  $\text{Me}_4\text{Si}$ ): 0.60~1.91 (m, CH,  $\text{CH}_2$ ,  $\text{CH}_3$ ), 2.27 (m, -C=C- $\text{CH}_2$ -, -O-CO- $\text{CH}_2$ -), 4.54 (m, - $\text{CF}_2\text{CH}_2\text{Ar}$ -,

OCH-), 5.36 (m, -C=CH-), 6.78 (t, Ar-H), 7.05 (d, Ar-H), 7.52 (t, Ar-H), 7.93 (d, Ar-H). FT-IR (KBr,  $\text{cm}^{-1}$ ): 2941 and 2868 (aliphatic C-H stretching), 1737 (C=O stretching), 1587 (aromatic C=C stretching), 1246 and 1145 (C-O stretching). Elemental analysis: calcd. for  $\text{C}_{52}\text{H}_{61}\text{F}_{17}\text{N}_2\text{O}_4$  C 56.73, H 5.58, N 2.54 %; found C 56.73, H 5.58, N 2.56 %

**4-{6-(cholesteryloxy)pentyl}-4'-perfluorooctyloxy-2',3'-difluoroazobenzene (4) (F-AOCF-5)**

$\delta_{\text{H}}$  (300 MHz;  $\text{CDCl}_3$ ;  $\text{Me}_4\text{Si}$ ): 0.60~1.91 (m, CH,  $\text{CH}_2$ ,  $\text{CH}_3$ ), 2.27 (m, -C=C- $\text{CH}_2$ -, -O-CO- $\text{CH}_2$ -), 4.54 (m, - $\text{CF}_2\text{CH}_2\text{Ar}$ , -OCH-), 5.36 (m, -C=CH-), 6.78 (t, Ar-H), 7.05 (d, Ar-H), 7.52 (t, Ar-H), 7.93 (d, Ar-H). FT-IR (KBr,  $\text{cm}^{-1}$ ): 2941 and 2868 (aliphatic C-H stretching), 1737 (C=O stretching), 1587 (aromatic C=C stretching), 1246 and 1145 (C-O stretching). Elemental analysis: calcd. for  $\text{C}_{53}\text{H}_{63}\text{F}_{17}\text{N}_2\text{O}_4$ , C 57.09, H 5.69, N 2.51 %; found C 57.10, H 5.70, N 2.52 %

**4-{7-(cholesteryloxy)hexyl}-4'-perfluorooctyloxy-2',3'-difluoroazobenzene (4) (F-AOCF-6)**

$\delta_{\text{H}}$  (300 MHz;  $\text{CDCl}_3$ ;  $\text{Me}_4\text{Si}$ ): 0.60~1.91 (m, CH,  $\text{CH}_2$ ,  $\text{CH}_3$ ), 2.27 (m, -C=C- $\text{CH}_2$ -, -O-CO- $\text{CH}_2$ -), 4.54 (m, - $\text{CF}_2\text{CH}_2\text{Ar}$ , -OCH-), 5.36 (m, -C=CH-), 6.78 (t, Ar-H), 7.05 (d, Ar-H), 7.52 (t, Ar-H), 7.93 (d, Ar-H). FT-IR (KBr,  $\text{cm}^{-1}$ ): 2941 and 2868 (aliphatic C-H stretching), 1737 (C=O stretching), 1587 (aromatic C=C stretching), 1246 and 1145 (C-O stretching). Elemental analysis: calcd. for  $\text{C}_{54}\text{H}_{65}\text{F}_{17}\text{N}_2\text{O}_4$  C 57.44, H 5.80, N 2.48 %; found C 57.44, H 5.80, N 2.48 %

**4-{9-(cholesteryloxy)octyl}-4'-perfluorooctyloxy-2',3'-difluoroazobenzene (4) (F-AOCF-8)**

$\delta_{\text{H}}$  (300 MHz;  $\text{CDCl}_3$ ;  $\text{Me}_4\text{Si}$ ): 0.60~1.91 (m, CH,  $\text{CH}_2$ ,  $\text{CH}_3$ ), 2.27 (m, -C=C- $\text{CH}_2$ -, -O-CO- $\text{CH}_2$ -), 4.54 (m, - $\text{CF}_2\text{CH}_2\text{Ar}$ , -OCH-), 5.36 (m, -C=CH-), 6.78 (t, Ar-H), 7.05 (d, Ar-H), 7.52 (t, Ar-H), 7.93 (d, Ar-H). FT-IR (KBr,  $\text{cm}^{-1}$ ): 2941 and 2868 (aliphatic C-H stretching), 1737 (C=O stretching), 1587 (aromatic C=C stretching), 1246 and 1145 (C-O stretching). Elemental analysis: calcd. for  $\text{C}_{56}\text{H}_{69}\text{F}_{17}\text{N}_2\text{O}_4$ , C 58.13, H 6.01, N 2.42 %; found C 58.11, H 6.00, N 2.43 %

**4-{10-(cholesteryloxy)nonyl}-4'-perfluorooctyloxy-2',3'-difluoroazobenzene (4) (F-AOCF-9)**

$\delta_{\text{H}}$  (300 MHz;  $\text{CDCl}_3$ ;  $\text{Me}_4\text{Si}$ ): 0.60~1.91 (m, CH,  $\text{CH}_2$ ,  $\text{CH}_3$ ), 2.27 (m, -C=C- $\text{CH}_2$ -, -O-CO- $\text{CH}_2$ -), 4.54 (m, - $\text{CF}_2\text{CH}_2\text{Ar}$ , -OCH-), 5.36 (m, -C=CH-), 6.78 (t, Ar-H), 7.05 (d, Ar-H), 7.52 (t, Ar-H), 7.93 (d, Ar-H). FT-IR (KBr,  $\text{cm}^{-1}$ ): 2941 and 2868 (aliphatic C-H stretching), 1737 (C=O stretching), 1587 (aromatic C=C stretching), 1246 and 1145 (C-O stretching). Elemental analysis: calcd. for  $\text{C}_{57}\text{H}_{73}\text{F}_{17}\text{N}_2\text{O}_4$ , C 58.46, H 6.11, N 2.39 %; found C 58.46, H 6.10, N 2.39 %

**4-{11-(cholesteryloxy)decyl}-4'-perfluorooctyloxy-2',3'-difluoroazobenzene (4) (F-AOCF-10)**

$\delta_{\text{H}}$  (300 MHz;  $\text{CDCl}_3$ ;  $\text{Me}_4\text{Si}$ ): 0.60~1.91 (m, CH,  $\text{CH}_2$ ,  $\text{CH}_3$ ), 2.27 (m, -C=C- $\text{CH}_2$ -, -O-CO- $\text{CH}_2$ -), 4.54 (m, - $\text{CF}_2\text{CH}_2\text{Ar}$ , -OCH-), 5.36 (m, -C=CH-), 6.78 (t, Ar-H), 7.05 (d, Ar-H), 7.52 (t, Ar-H), 7.93 (d, Ar-H). FT-IR (KBr,  $\text{cm}^{-1}$ ): 2941 and 2868 (aliphatic C-H stretching), 1737 (C=O stretching), 1587 (aromatic C=C stretching), 1246 and 1145 (C-O stretching). Elemental analysis: calcd. for  $\text{C}_{58}\text{H}_{73}\text{F}_{17}\text{N}_2\text{O}_4$  C 58.78, H 6.21, N 2.36 %; found C 58.78, H 6.21, N 2.36 %

**4-{12-(cholesteryloxy)undecyl}-4'-perfluorooctyloxy-2',3'-difluoroazobenzene (4) (F-AOCF-11)**

$\delta_{\text{H}}$  (300 MHz;  $\text{CDCl}_3$ ;  $\text{Me}_4\text{Si}$ ): 0.60~1.91 (m, CH,  $\text{CH}_2$ ,  $\text{CH}_3$ ), 2.27 (m, -C=C- $\text{CH}_2$ -, -O-CO- $\text{CH}_2$ -), 4.54 (m, - $\text{CF}_2\text{CH}_2\text{Ar}$ , -

OCH-), 5.36 (m, -C=CH-), 6.78 (t, Ar-H), 7.05 (d, Ar-H), 7.52 (t, Ar-H), 7.93 (d, Ar-H). FT-IR (KBr,  $\text{cm}^{-1}$ ): 2941 and 2868 (aliphatic C-H stretching), 1737 (C=O stretching), 1587 (aromatic C=C stretching), 1246 and 1145 (C-O stretching). Elemental analysis: calcd. for  $\text{C}_{59}\text{H}_{75}\text{F}_{17}\text{N}_2\text{O}_4$ , C 59.09, H 6.30, N 2.34 %; found C 59.10, H 6.33, N 2.34 %

**4-{13-(cholesteryloxy)dodecyl}-4'-perfluorooctyloxy-2',3'-difluoroazobenzene (4) (F-AOCF-12)**

$\delta_{\text{H}}$  (300 MHz;  $\text{CDCl}_3$ ;  $\text{Me}_4\text{Si}$ ): 0.60~1.91 (m, CH,  $\text{CH}_2$ ,  $\text{CH}_3$ ), 2.27 (m, -C=C- $\text{CH}_2$ -, -O-CO- $\text{CH}_2$ -), 4.54 (m, - $\text{CF}_2\text{CH}_2\text{Ar}$ , -OCH-), 5.36 (m, -C=CH-), 6.78 (t, Ar-H), 7.05 (d, Ar-H), 7.52 (t, Ar-H), 7.93 (d, Ar-H). FT-IR (KBr,  $\text{cm}^{-1}$ ): 2941 and 2868 (aliphatic C-H stretching), 1737 (C=O stretching), 1587 (aromatic C=C stretching), 1246 and 1145 (C-O stretching). Elemental analysis: calcd. for  $\text{C}_{60}\text{H}_{77}\text{F}_{17}\text{N}_2\text{O}_4$ , C 59.40, H 6.40, N 2.31 %; found C 59.39, H 6.38, N 2.33 %
